# Supplementary material
Source: MDPI journal article supplement (https://www.mdpi.com/2077-0472/13/9/1806)
Supplement: s1 [file s1]

**Table S1.** Data Source: Panel Data on Agricultural Economy across 31 Provinces in China, 2015-2021.

|      | DMU            | Consumption of Pesticides (ton) | Rural Population (10,000P) | Consumption of Chemical Fertilizers (10,000tons) | Consumption of Diesels (10,000tons) | Gross Output Value of Agriculture, Forestry, Animal Husbandry and Fishery (100millions CNY) |
|------|----------------|---------------------------------|----------------------------|--------------------------------------------------|-------------------------------------|---------------------------------------------------------------------------------------------|
| 2015 | Beijing        | 3174                            | 292.50                     | 10.5                                             | 2.8                                 | 368.24                                                                                      |
| 2015 | Tianjin        | 3528                            | 268.55                     | 21.8                                             | 15.5                                | 467.44                                                                                      |
| 2015 | Hebei          | 83328                           | 3613.71                    | 335.5                                            | 293.2                               | 5978.88                                                                                     |
| 2015 | Shanxi         | 31035                           | 1647.75                    | 118.5                                            | 29.8                                | 1522.64                                                                                     |
| 2015 | Inner Mongolia | 32961                           | 996.88                     | 229.4                                            | 80.4                                | 2751.55                                                                                     |
| 2015 | Liaoning       | 59875                           | 1430.85                    | 152.1                                            | 72.5                                | 4686.71                                                                                     |
| 2015 | Jilin          | 62285                           | 1230.46                    | 231.2                                            | 66.7                                | 2880.62                                                                                     |
| 2015 | Heilongjiang   | 82949                           | 1571.00                    | 255.3                                            | 145                                 | 5044.93                                                                                     |
| 2015 | Shanghai       | 4415                            | 299.49                     | 9.9                                              | 13.4                                | 302.62                                                                                      |
| 2015 | Jiangsu        | 78100                           | 2670.47                    | 320                                              | 108.6                               | 7030.76                                                                                     |
| 2015 | Zhejiang       | 56458                           | 1894.34                    | 87.5                                             | 203.2                               | 2933.44                                                                                     |
| 2015 | Anhui          | 111048                          | 3041.08                    | 338.7                                            | 75.7                                | 4390.80                                                                                     |
| 2015 | Fujian         | 55770                           | 1435.79                    | 123.8                                            | 86.2                                | 3717.87                                                                                     |
| 2015 | Jiangxi        | 93873                           | 2208.85                    | 143.6                                            | 28.8                                | 2859.10                                                                                     |
| 2015 | Shandong       | 151004                          | 4233.29                    | 463.5                                            | 165.8                               | 9549.63                                                                                     |
| 2015 | Henan          | 128748                          | 5038.62                    | 716.1                                            | 114.7                               | 7641.27                                                                                     |
| 2015 | Hubei          | 120685                          | 2524.92                    | 333.9                                            | 65.6                                | 5728.56                                                                                     |
| 2015 | Hunan          | 122353                          | 3331.15                    | 246.5                                            | 43.6                                | 5630.75                                                                                     |
| 2015 | Guangdong      | 113782                          | 3394.65                    | 256.5                                            | 78.7                                | 5520.03                                                                                     |
| 2015 | Guangxi        | 74916                           | 2539.00                    | 259.9                                            | 64.8                                | 4197.12                                                                                     |
| 2015 | Hainan         | 39800                           | 408.78                     | 51.1                                             | 21.7                                | 1323.91                                                                                     |
| 2015 | Chongqing      | 18199                           | 1178.26                    | 97.7                                             | 21.4                                | 1738.15                                                                                     |
| 2015 | Sichuan        | 58912                           | 4291.00                    | 249.8                                            | 46.9                                | 6377.84                                                                                     |
| 2015 | Guizhou        | 13722                           | 2046.76                    | 103.7                                            | 11                                  | 2738.67                                                                                     |
| 2015 | Yunnan         | 58648                           | 2687.18                    | 231.9                                            | 86.3                                | 3383.09                                                                                     |
| 2015 | Tibet          | 1074                            | 234.10                     | 6                                                | 5.4                                 | 149.46                                                                                      |
| 2015 | Shaanxi        | 13092                           | 1747.81                    | 231.9                                            | 92.3                                | 2813.50                                                                                     |
| 2015 | Gansu          | 78848                           | 1476.80                    | 97.9                                             | 42.7                                | 1722.09                                                                                     |
| 2015 | Qinghai        | 1956                            | 292.45                     | 10.1                                             | 6.5                                 | 319.27                                                                                      |
| 2015 | Ningxia        | 2593                            | 299.01                     | 40.1                                             | 22.2                                | 483.02                                                                                      |
| 2015 | Xinjiang       | 25838                           | 1245.23                    | 248.1                                            | 86.3                                | 2804.42                                                                                     |
| 2016 | Beijing        | 3031.00                         | 293.355                    | 9.7                                              | 2.50                                | 338.06351                                                                                   |

|      |                |           |         |             |        |             |
|------|----------------|-----------|---------|-------------|--------|-------------|
| 2016 | Tianjin        | 3307.00   | 266.633 | 21.4        | 14.90  | 494.4426492 |
| 2016 | Hebei          | 81691.00  | 3487    | 331.8       | 218.70 | 6083.856809 |
| 2016 | Shanxi         | 30550.00  | 1612.35 | 117.1       | 29.20  | 1534.02503  |
| 2016 | Inner Mongolia | 32339.00  | 978.012 | 234.6       | 81.00  | 2794.217417 |
| 2016 | Liaoning       | 56264.00  | 1428.54 | 148.1       | 70.70  | 4421.777139 |
| 2016 | Jilin          | 58523.00  | 1203.34 | 233.6       | 67.00  | 2724.875662 |
| 2016 | Heilongjiang   | 82474.00  | 1549.99 | 252.8       | 145.50 | 5197.753455 |
| 2016 | Shanghai       | 3913.00   | 292.82  | 9.2         | 13.70  | 285.0856727 |
| 2016 | Jiangsu        | 76184.00  | 2582.08 | 312.5       | 108.70 | 7235.0635   |
| 2016 | Zhejiang       | 49482.00  | 1844.7  | 84.5        | 203.20 | 3146.0617   |
| 2016 | Anhui          | 105704.00 | 2974.7  | 327         | 75.70  | 4655.5279   |
| 2016 | Fujian         | 55387.00  | 1410.14 | 123.8       | 86.30  | 4155.680836 |
| 2016 | Jiangxi        | 92188.00  | 2153.65 | 142         | 27.80  | 3130.29252  |
| 2016 | Shandong       | 148640.00 | 4076.28 | 456.5       | 162.50 | 9325.8896   |
| 2016 | Henan          | 127107.00 | 4908.98 | 715         | 112.40 | 7799.674218 |
| 2016 | Hubei          | 117401.00 | 2465.82 | 328         | 65.90  | 6278.3519   |
| 2016 | Hunan          | 118661.00 | 3223.4  | 246.4       | 43.70  | 6081.918079 |
| 2016 | Guangdong      | 113652.00 | 3387.69 | 261         | 79.90  | 6078.428728 |
| 2016 | Guangxi        | 85694.00  | 2511.89 | 262.1       | 63.60  | 4591.36902  |
| 2016 | Hainan         | 34028.00  | 396.327 | 50.6        | 19.90  | 1470.407951 |
| 2016 | Chongqing      | 17604.00  | 1139.95 | 96.2        | 21.60  | 1968.275097 |
| 2016 | Sichuan        | 58038.00  | 4196.27 | 249         | 46.90  | 6831.077729 |
| 2016 | Guizhou        | 13677.00  | 1985.47 | 103.7       | 11.20  | 3097.187276 |
| 2016 | Yunnan         | 58601.00  | 2622.62 | 235.6       | 84.80  | 3633.120926 |
| 2016 | Tibet          | 1091.00   | 233.156 | 5.9         | 6.20   | 172.973117  |
| 2016 | Shaanxi        | 13190.00  | 1702.89 | 233.1       | 92.80  | 2985.7636   |
| 2016 | Gansu          | 69915.00  | 1443.59 | 93.4        | 44.20  | 1778.000993 |
| 2016 | Qinghai        | 1939.00   | 286.834 | 8.8         | 6.40   | 338.797712  |
| 2016 | Ningxia        | 2587.00   | 295.043 | 40.7        | 22.50  | 493.6046989 |
| 2016 | Xinjiang       | 27596.00  | 1238.57 | 250.2       | 87.80  | 2969.696254 |
| 2017 | Beijing        | 2726.00   | 286.756 | 8.54937     | 2.20   | 308.31747   |
| 2017 | Tianjin        | 2353.00   | 231.663 | 18.0098943  | 14.00  | 382.0656193 |
| 2017 | Hebei          | 77623.00  | 3279.22 | 321.9959    | 224.60 | 5373.378759 |
| 2017 | Shanxi         | 28831.00  | 1453.49 | 111.998382  | 28.50  | 1418.7298   |
| 2017 | Inner Mongolia | 35618.00  | 861.282 | 235.0396    | 73.60  | 2813.535561 |
| 2017 | Liaoning       | 57474.00  | 1315.59 | 145.4660425 | 69.30  | 3851.624713 |
| 2017 | Jilin          | 56294.00  | 1017.73 | 231.024658  | 67.60  | 2064.290852 |
| 2017 | Heilongjiang   | 83218.00  | 1295.02 | 251.2       | 146.80 | 5586.6319   |
| 2017 | Shanghai       | 3523.00   | 268.794 | 8.896308692 | 14.50  | 292.613368  |

|      |                |           |         |            |        |             |
|------|----------------|-----------|---------|------------|--------|-------------|
| 2017 | Jiangsu        | 73167.00  | 2511.74 | 303.8503   | 109.00 | 7161.2062   |
| 2017 | Zhejiang       | 46303.00  | 1918.25 | 82.6301    | 201.60 | 3093.3568   |
| 2017 | Anhui          | 99394.00  | 2768.65 | 318.7237   | 75.50  | 4597.941841 |
| 2017 | Fujian         | 52167.00  | 1391.04 | 116.3227   | 83.60  | 3947.15903  |
| 2017 | Jiangxi        | 87737.00  | 1998.37 | 134.9715   | 29.60  | 3069.005086 |
| 2017 | Shandong       | 140670.00 | 3933.94 | 439.9594   | 157.70 | 9140.359657 |
| 2017 | Henan          | 120713.00 | 4859.46 | 706.7      | 108.80 | 7562.529755 |
| 2017 | Hubei          | 109588.00 | 2368.68 | 317.93     | 66.30  | 6129.718161 |
| 2017 | Hunan          | 116023.00 | 3010.06 | 245.25802  | 44.20  | 5213.477419 |
| 2017 | Guangdong      | 112958.00 | 3552.46 | 258.303596 | 77.70  | 5969.870828 |
| 2017 | Guangxi        | 72495.00  | 2424.55 | 263.8308   | 56.80  | 4698.709216 |
| 2017 | Hainan         | 33408.00  | 407.851 | 51.360118  | 16.20  | 1488.864369 |
| 2017 | Chongqing      | 17467.00  | 1100.4  | 95.464922  | 21.70  | 1902.467076 |
| 2017 | Sichuan        | 55751.00  | 3996.96 | 241.9511   | 46.70  | 6955.548641 |
| 2017 | Guizhou        | 13399.00  | 1986.69 | 95.6546    | 11.40  | 3413.860099 |
| 2017 | Yunnan         | 57675.00  | 2520.61 | 231.9402   | 85.90  | 3872.92665  |
| 2017 | Tibet          | 1076.00   | 232.504 | 5.53312    | 5.60   | 178.1602908 |
| 2017 | Shaanxi        | 13335.00  | 1636.95 | 232.1487   | 93.40  | 3077.624149 |
| 2017 | Gansu          | 51995.00  | 1308.41 | 84.49      | 45.50  | 1559.64071  |
| 2017 | Qinghai        | 1875.00   | 261.063 | 8.67       | 6.40   | 364.097363  |
| 2017 | Ningxia        | 2540.00   | 275.303 | 40.7994    | 22.00  | 517.4168091 |
| 2017 | Xinjiang       | 27670.00  | 1192.88 | 250.74     | 88.30  | 3326.592739 |
| 2018 | Beijing        | 2574.00   | 282.987 | 7.3        | 1.90   | 296.8       |
| 2018 | Tianjin        | 2190.00   | 221.972 | 16.9       | 2.20   | 390.5       |
| 2018 | Hebei          | 61450.00  | 3168.67 | 312.4      | 217.60 | 5707        |
| 2018 | Shanxi         | 26543.00  | 1406.05 | 109.6      | 27.60  | 1460.6      |
| 2018 | Inner Mongolia | 29585.00  | 835.348 | 222.7      | 79.20  | 2985.3      |
| 2018 | Liaoning       | 55070.00  | 1276.14 | 145        | 62.40  | 4061.9      |
| 2018 | Jilin          | 50991.00  | 972.486 | 228.3      | 67.30  | 2184.3      |
| 2018 | Heilongjiang   | 74182.00  | 1215.69 | 245.6      | 147.40 | 5624.3      |
| 2018 | Shanghai       | 3177.00   | 269.033 | 8.4        | 13.10  | 289.6       |
| 2018 | Jiangsu        | 69600.00  | 2433.29 | 292.5      | 109.40 | 7192.5      |
| 2018 | Zhejiang       | 43725.00  | 1880.65 | 77.8       | 198.80 | 3157.3      |
| 2018 | Anhui          | 94177.00  | 2694.71 | 311.8      | 75.50  | 4672.7      |
| 2018 | Fujian         | 49143.00  | 1355.14 | 110.7      | 82.40  | 4229.5      |
| 2018 | Jiangxi        | 77183.00  | 1925.25 | 123.2      | 30.90  | 3148.6      |
| 2018 | Shandong       | 129882.00 | 3883.68 | 420.3      | 147.50 | 9397.4      |
| 2018 | Henan          | 113603.00 | 4711.05 | 692.8      | 103.90 | 7757.9      |
| 2018 | Hubei          | 103317.00 | 2307.63 | 295.8      | 65.10  | 6207.8      |
| 2018 | Hunan          | 114155.00 | 2913.43 | 242.6      | 44.60  | 5361.6      |
| 2018 | Guangdong      | 93684.00  | 3480.9  | 231.3      | 88.50  | 6318.1      |
| 2018 | Guangxi        | 69714.00  | 2383.46 | 255        | 52.70  | 4909.2      |

|      |                |           |         |       |        |             |
|------|----------------|-----------|---------|-------|--------|-------------|
| 2018 | Hainan         | 23250.00  | 401.343 | 48.4  | 20.60  | 1535.7      |
| 2018 | Chongqing      | 17191.00  | 1056.13 | 93.2  | 21.40  | 2052.4      |
| 2018 | Sichuan        | 51276.00  | 3869.27 | 235.2 | 46.90  | 7195.6      |
| 2018 | Guizhou        | 11122.00  | 1928.58 | 89.5  | 11.10  | 3619.5      |
| 2018 | Yunnan         | 52591.00  | 2471.9  | 217.4 | 25.40  | 4108.9      |
| 2018 | Tibet          | 982.00    | 234.348 | 5.2   | 3.00   | 195.5       |
| 2018 | Shaanxi        | 12550.00  | 1586.16 | 229.6 | 92.60  | 3240        |
| 2018 | Gansu          | 42864.00  | 1265.3  | 83.2  | 40.80  | 1659.4      |
| 2018 | Qinghai        | 1784.00   | 250.825 | 8.3   | 6.40   | 405.9       |
| 2018 | Ningxia        | 2266.00   | 268.735 | 38.4  | 21.70  | 575.8       |
| 2018 | Xinjiang       | 23732.00  | 1158.95 | 255   | 95.50  | 3637.8      |
| 2019 | Beijing        | 2257.00   | 277.035 | 6.2   | 1.80   | 281.70446   |
| 2019 | Tianjin        | 2171.00   | 217.307 | 16.2  | 2.10   | 414.3546459 |
| 2019 | Hebei          | 57344.00  | 3070.4  | 297.3 | 200.10 | 6061.463337 |
| 2019 | Shanxi         | 25319.00  | 1353.69 | 108.4 | 26.40  | 1626.54418  |
| 2019 | Inner Mongolia | 27278.00  | 809.991 | 218.4 | 77.40  | 3176.342172 |
| 2019 | Liaoning       | 51074.00  | 1231.35 | 139.9 | 59.90  | 4368.247668 |
| 2019 | Jilin          | 48658.00  | 939.298 | 227.1 | 65.70  | 2442.725617 |
| 2019 | Heilongjiang   | 64267.00  | 1151.62 | 223.3 | 137.40 | 5929.968    |
| 2019 | Shanghai       | 2771.00   | 267.452 | 7.5   | 13.00  | 284.8425621 |
| 2019 | Jiangsu        | 67396.00  | 2331.52 | 286.2 | 108.90 | 7503.1543   |
| 2019 | Zhejiang       | 38572.00  | 1811.78 | 72.5  | 190.50 | 3355.246618 |
| 2019 | Anhui          | 88271.00  | 2618.34 | 298   | 74.70  | 5162.13384  |
| 2019 | Fujian         | 45477.00  | 1329.22 | 106.3 | 81.20  | 4636.564742 |
| 2019 | Jiangxi        | 62701.00  | 1848.4  | 115.6 | 30.10  | 3481.292609 |
| 2019 | Shandong       | 120342.00 | 3854.43 | 395.3 | 137.60 | 9671.6671   |
| 2019 | Henan          | 107231.00 | 4553.47 | 666.7 | 100.10 | 8541.774606 |
| 2019 | Hubei          | 97024.00  | 2262.34 | 273.9 | 63.50  | 6681.854794 |
| 2019 | Hunan          | 105548.00 | 2825.32 | 229   | 44.80  | 6405.055402 |
| 2019 | Guangdong      | 87489.00  | 3415.74 | 225.8 | 85.50  | 7175.888675 |
| 2019 | Guangxi        | 68144.00  | 2342.54 | 252   | 53.40  | 5498.805563 |
| 2019 | Hainan         | 21358.00  | 404.269 | 46.3  | 15.70  | 1689.399204 |
| 2019 | Chongqing      | 16542.00  | 1012.51 | 91.1  | 21.20  | 2337.806247 |
| 2019 | Sichuan        | 46290.00  | 3727.89 | 222.8 | 47.00  | 7889.347228 |
| 2019 | Guizhou        | 9210.00   | 1867.05 | 83.2  | 11.30  | 3888.989526 |
| 2019 | Yunnan         | 47441.00  | 2419.7  | 204   | 26.20  | 4935.733211 |
| 2019 | Tibet          | 802.00    | 236.419 | 4.8   | 3.30   | 212.807243  |
| 2019 | Shaanxi        | 12240.00  | 1527.12 | 202.5 | 93.80  | 3536.8034   |
| 2019 | Gansu          | 41938.00  | 1236.94 | 80.9  | 39.10  | 1887.575514 |
| 2019 | Qinghai        | 1398.00   | 243.198 | 6.2   | 6.60   | 454.35043   |
| 2019 | Ningxia        | 2245.00   | 260.773 | 38.4  | 21.50  | 584.8468533 |
| 2019 | Xinjiang       | 22948.00  | 1138.5  | 257.8 | 94.20  | 3850.64553  |

|      |                |           |         |       |        |             |
|------|----------------|-----------|---------|-------|--------|-------------|
| 2020 | Beijing        | 2149.00   | 272.531 | 6.1   | 1.70   | 263.4       |
| 2020 | Tianjin        | 1997.00   | 212.211 | 15.3  | 2.00   | 476.4       |
| 2020 | Hebei          | 54289.00  | 2980.38 | 285.7 | 140.50 | 6742.5      |
| 2020 | Shanxi         | 24866.00  | 1307.7  | 107.4 | 26.00  | 1935.8      |
| 2020 | Inner Mongolia | 23426.00  | 781.456 | 207.7 | 78.10  | 3472.4      |
| 2020 | Liaoning       | 44722.00  | 1185.44 | 137.6 | 59.20  | 4582.6      |
| 2020 | Jilin          | 46930.00  | 896.266 | 225.3 | 65.80  | 2976        |
| 2020 | Heilongjiang   | 60749.00  | 1090.51 | 224.2 | 138.50 | 6438.1      |
| 2020 | Shanghai       | 2644.00   | 266.216 | 6.9   | 14.60  | 279.8       |
| 2020 | Jiangsu        | 65703.00  | 2251.49 | 280.8 | 108.60 | 7952.6      |
| 2020 | Zhejiang       | 36561.00  | 1800.04 | 69.6  | 188.60 | 3496.9      |
| 2020 | Anhui          | 83294.00  | 2543.95 | 289.9 | 75.20  | 5680.9      |
| 2020 | Fujian         | 43163.00  | 1300.31 | 100.8 | 78.40  | 4901.1      |
| 2020 | Jiangxi        | 52708.00  | 1787.72 | 108.8 | 30.00  | 3820.7      |
| 2020 | Shandong       | 114311.00 | 3755.97 | 380.9 | 126.40 | 10190.6     |
| 2020 | Henan          | 102400.00 | 4430.7  | 648   | 97.40  | 9956.3      |
| 2020 | Hubei          | 93143.00  | 2131.97 | 267.3 | 62.80  | 7303.6      |
| 2020 | Hunan          | 101450.00 | 2740.4  | 223.7 | 45.20  | 7512        |
| 2020 | Guangdong      | 83217.00  | 3263.3  | 219.8 | 85.80  | 7901.9      |
| 2020 | Guangxi        | 66026.00  | 2298.7  | 247.9 | 52.80  | 5913.3      |
| 2020 | Hainan         | 19747.00  | 402.068 | 42.6  | 15.00  | 1821        |
| 2020 | Chongqing      | 16205.00  | 980.029 | 89.8  | 21.30  | 2749.1      |
| 2020 | Sichuan        | 42130.00  | 3622.13 | 210.8 | 47.10  | 9216.4      |
| 2020 | Guizhou        | 8423.00   | 1807.47 | 78.8  | 10.80  | 4358.6      |
| 2020 | Yunnan         | 44846.00  | 2358.64 | 196.7 | 30.40  | 5920.5      |
| 2020 | Tibet          | 714.00    | 235.228 | 4.4   | 3.80   | 233.5       |
| 2020 | Shaanxi        | 11951.00  | 1476.8  | 201.9 | 93.40  | 4056.6      |
| 2020 | Gansu          | 40312.00  | 1194.73 | 80.4  | 36.10  | 2103.6      |
| 2020 | Qinghai        | 1233.00   | 236.726 | 5.5   | 6.50   | 507.1       |
| 2020 | Ningxia        | 2174.00   | 252.638 | 38.1  | 21.40  | 703.1       |
| 2020 | Xinjiang       | 21823.00  | 1125.87 | 248.2 | 85.20  | 4315.6      |
| 2021 | Beijing        | 2334.00   | 273.625 | 6.3   | 1.60   | 269.51385   |
| 2021 | Tianjin        | 1742.00   | 207.598 | 15.7  | 2.00   | 509.2576    |
| 2021 | Hebei          | 52691.00  | 2894.29 | 276.9 | 134.50 | 7018.6745   |
| 2021 | Shanxi         | 23594.00  | 1272.98 | 105.6 | 25.80  | 2134.01854  |
| 2021 | Inner Mongolia | 26692.00  | 762.96  | 241.9 | 80.70  | 3815.119131 |
| 2021 | Liaoning       | 43386.00  | 1149.87 | 135   | 58.70  | 4927.731    |
| 2021 | Jilin          | 45139.00  | 870.2   | 223   | 64.80  | 2972.324055 |
| 2021 | Heilongjiang   | 57090.00  | 1072.19 | 239   | 140.30 | 6459.9693   |
| 2021 | Shanghai       | 2384.00   | 266.323 | 6.6   | 3.10   | 268.930402  |
| 2021 | Jiangsu        | 63547.00  | 2216.4  | 275.6 | 104.30 | 8279.7242   |

|             |                  |           |         |       |        |             |
|-------------|------------------|-----------|---------|-------|--------|-------------|
| <b>2021</b> | <b>Zhejiang</b>  | 34563.00  | 1788.04 | 68.3  | 176.90 | 3579.211097 |
| <b>2021</b> | <b>Anhui</b>     | 75993.00  | 2482.49 | 284.7 | 74.40  | 6004.310139 |
| <b>2021</b> | <b>Fujian</b>    | 41689.00  | 1268.66 | 96.6  | 78.00  | 5200.967994 |
| <b>2021</b> | <b>Jiangxi</b>   | 51629.00  | 1740.85 | 108.6 | 29.90  | 3998.093588 |
| <b>2021</b> | <b>Shandong</b>  | 108230.00 | 3667.3  | 371   | 122.20 | 11468.0094  |
| <b>2021</b> | <b>Henan</b>     | 97432.00  | 4304.05 | 624.7 | 95.30  | 10501.2004  |
| <b>2021</b> | <b>Hubei</b>     | 90468.00  | 2093.55 | 262.6 | 62.40  | 8296.4405   |
| <b>2021</b> | <b>Hunan</b>     | 91114.00  | 2668    | 219.1 | 46.00  | 7662.356887 |
| <b>2021</b> | <b>Guangdong</b> | 77440.00  | 3217.93 | 212.9 | 85.40  | 8305.836987 |
| <b>2021</b> | <b>Guangxi</b>   | 64233.00  | 2262.62 | 251.9 | 50.20  | 6524.391281 |
| <b>2021</b> | <b>Hainan</b>    | 18729.00  | 398.106 | 40.8  | 13.70  | 2014.794832 |
| <b>2021</b> | <b>Chongqing</b> | 16038.00  | 953.322 | 89.1  | 21.30  | 2935.648866 |
| <b>2021</b> | <b>Sichuan</b>   | 40974.00  | 3531.31 | 207.2 | 47.00  | 9383.320013 |
| <b>2021</b> | <b>Guizhou</b>   | 7048.00   | 1759.21 | 76    | 10.40  | 4691.96557  |
| <b>2021</b> | <b>Yunnan</b>    | 41104.00  | 2295.76 | 187.3 | 28.30  | 6351.816721 |
| <b>2021</b> | <b>Tibet</b>     | 485.00    | 232.007 | 4.3   | 3.70   | 255.341017  |
| <b>2021</b> | <b>Shaanxi</b>   | 11643.00  | 1438.07 | 200.7 | 91.90  | 4313.4389   |
| <b>2021</b> | <b>Gansu</b>     | 28107.00  | 1162.08 | 77.1  | 36.00  | 2439.535823 |
| <b>2021</b> | <b>Qinghai</b>   | 1069.00   | 231.541 | 4.9   | 6.90   | 528.529582  |
| <b>2021</b> | <b>Ningxia</b>   | 2204.00   | 246.21  | 37.5  | 20.50  | 759.805028  |
| <b>2021</b> | <b>Xinjiang</b>  | 20388.00  | 1106.54 | 240.7 | 85.80  | 5143.122509 |
